# Supplementary material
Source: HighWire-hosted journal article supplement (https://mentalhealth.bmj.com/content/24/2/77)
Supplement: inline-supplementary-material-1 [file inline-supplementary-material-1.pdf]

**Appendix 1 – Distribution-based MID estimation methods**

| Method                               | Reference                 | PROM evaluated in relation to:                 | Calculation                                                                     |
|--------------------------------------|---------------------------|------------------------------------------------|---------------------------------------------------------------------------------|
| <b>Paired <i>t</i>-statistic</b>     | Husted et al., 2000       | Standard error of the mean change              | $\frac{x_1 - x_0}{\sqrt{\frac{\sum(d_i - \bar{d})^2}{n(n-1)}}}$                 |
| <b>Growth curve analysis</b>         | Speer and Greenbaum, 1995 | Standard error of the slope                    | $\frac{B}{\sqrt{V}}$                                                            |
| <b>Effect size</b>                   | Cohen, 1988               | Pre-test standard deviation                    | $\frac{x_1 - x_0}{\sqrt{\frac{\sum(x_0 - \bar{x}_0)^2}{n-1}}}$                  |
| <b>Standardized response mean</b>    | Stucki et al., 1995       | Standard deviation of change                   | $\frac{x_1 - x_0}{\sqrt{\frac{\sum(d_i - \bar{d})^2}{(n-1)}}}$                  |
| <b>Responsiveness statistic</b>      | Guyatt et al., 1986       | Standard deviation of change in a stable group | $\frac{x_1 - x_0}{\sqrt{\frac{\sum(d_{i\ stable} - \bar{d}_{stable})^2}{n-1}}}$ |
| <b>Standard error of measurement</b> | Wyrich et al., 1999       | Standard error of measurement                  | $\frac{x_1 - x_0}{\sqrt{\frac{\sum(x_0 - \bar{x}_0)^2}{(n-1)}(\sqrt{1-r})}}$    |
| <b>Reliable change index</b>         | Jacobson and Truax, 1991  | Standard error of the measurement difference   | $\frac{x_1 - x_0}{\sqrt{2(SEM)^2}}$                                             |

Table reproduced from Crosby RD. J Clin Epidemiol. 2003;56(5):395-407.

$x_0$  = pre-test score

$x_1$  = post-test score

$d_i$  = pre-to-post difference score for subject  $i$

$\bar{d}$  = mean difference score

$n$  = sample size

$r$  = reliability of the measure

$B$  = empirical Bayes estimate of the individual slope

$\sqrt{V}$  = empirical Bayes estimate of the Standard error of the slope

SEM = Standard Error of Measurement

PROM, patient reported outcome measure
