# Supplementary material
Source: HighWire-hosted journal article supplement (https://mentalhealth.bmj.com/content/24/2/77)
Supplement: inline-supplementary-material-2 [file inline-supplementary-material-2.pdf]

## Appendix 2. Terms referring to the minimal important difference concept across 338 included studies in our MID inventory

### Terms

---

Clinically important difference; minimum deterioration  
Clinically important difference; minimum improvement  
Clinically important difference  
Clinically important difference for deterioration  
Clinically important difference for improvement  
Clinically meaningful change  
Clinically meaningful improvement  
Clinically relevant change  
Clinically significant improvement  
Greater fatigue minimal clinically important difference  
Less fatigue minimal clinically important difference  
Minimal clinical important difference  
Minimal clinical important difference for negative change  
Minimal clinical important difference for positive change  
Minimal clinically important change  
Minimal clinically important change for improvement  
Minimal clinically important change for worsening  
Minimal clinically important difference  
Minimal clinically important difference for deterioration  
Minimal clinically important difference for improvement  
Minimal clinically important difference for perceived deterioration  
Minimal clinically important difference for perceived improvement  
Minimal clinically important difference for worsening  
Minimal clinically important difference improvement  
Minimal clinically important difference of deterioration  
Minimal clinically important difference of improvement  
Minimal clinically important difference post treatment  
Minimal clinically important difference pre treatment  
Minimal clinically important improvement  
Minimal clinically important score-difference for deterioration  
Minimal clinically important score-difference for improvement  
Minimal clinically meaningful difference  
Minimal clinically significant difference  
Minimal clinically significant improvement  
Minimal important change  
Minimal important change for improvement  
Minimal important deterioration  
Minimal important difference  
Minimal important difference deterioration  
Minimal important difference for deterioration  
Minimal important difference for improvement  
Minimal important difference for patients indicating deterioration

Minimal important difference for patients indicating improvement  
Minimal important difference for those who deteriorated  
Minimal important difference for those who improved  
Minimal important difference for worsening  
Minimal important difference improvement  
Minimal important improvement  
Minimal patient perceivable deterioration  
Minimal patient perceivable improvement  
Minimally clinical important difference  
Minimally clinically identifiable difference  
Minimally clinically important change for deterioration  
Minimally clinically important difference  
Minimally important change  
Minimally important change for deterioration  
Minimally important change for improvement  
Minimally important change for those who improved  
Minimally important change improvement  
Minimally important difference  
Minimally important difference for deterioration  
Minimally important difference for improvement  
Minimally important difference for those who deteriorated  
Minimally important difference for those who improved  
Minimally important difference for worsening  
Minimally important difference improved  
Minimally important difference improvement  
Minimally important difference to reflect deterioration  
Minimally important difference worsened  
Minimally important difference worsening  
Minimally important percent change  
Minimum clinical important difference  
Minimum clinically important change  
Minimum clinically important difference  
Minimum clinically important improvement  
Minimum clinically significant change  
Minimum clinically significant difference  
Minimum important change  
Minimum important difference  
Minimum patient perceivable deterioration  
Negative minimal clinically important difference  
Negative minimal important difference  
Positive minimal clinically important difference  
Positive minimal important difference  
Responder definition deterioration  
Responder definition improvement
